# Supplementary material
Source: PubMed Central journal article supplement (PMC8325564)
Supplement: NIHMS1725248-supplement-SI_file.pdf [file NIHMS1725248-supplement-SI_file.pdf]

# Supporting Information

## **Structural basis for GTP versus ATP selectivity in the NMP kinase AK3**

Per Rogne<sup>1</sup>, Beata Dulko-Smith<sup>2</sup>, Jack Goodman<sup>1</sup>, Marie Rosselin<sup>1</sup>, Christin Grundström<sup>1</sup>, Christian Hedberg<sup>1</sup>, Kwangho Nam<sup>2</sup>, A. Elisabeth Sauer-Eriksson<sup>1</sup> & Magnus Wolf-Watz<sup>1</sup>

<sup>1</sup>) Chemistry Department, Umeå University, 901 87 Umeå, Sweden

<sup>2</sup>) Department of Chemistry and Biochemistry, University of Texas at Arlington, Arlington, TX 76019-0065, USA

Correspondence to: [elisabeth.sauer-eriksson@umu.se](mailto:elisabeth.sauer-eriksson@umu.se) or [magnus.wolf-watz@umu.se](mailto:magnus.wolf-watz@umu.se)

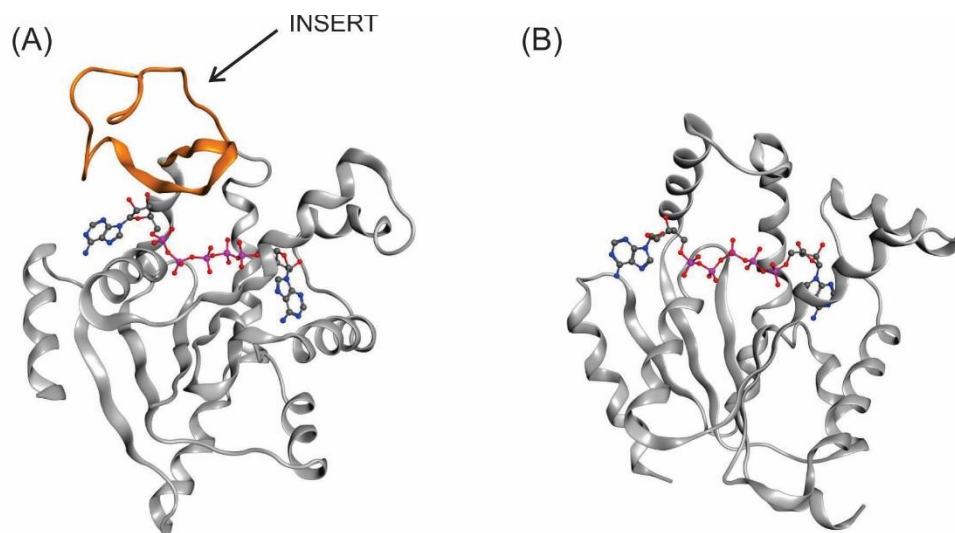

**Figure S1.** Structures of long and short monomeric NMP kinases. **(A)** Example of a long monomeric NMP kinase with the INSERT segment indicated and colored in orange. Adenylate kinase from *Escherichia Coli* in complex with the inhibitor Ap5A<sup>1</sup> (1AKE). **(B)** Example of a short monomeric NMP kinase. Adenylate kinase from the Antarctic fish *Notothenia coriiceps* in complex with Ap5A<sup>2</sup> (5XZ2).

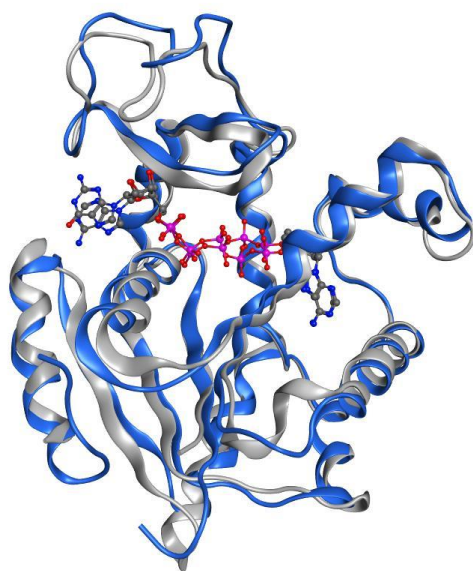

**Figure S2.** AK3 in a closed conformation in complex with the inhibitor. Shown is a superimposition of AK3 (blue ribbon) in complex with Gp5A with AK<sub>eco</sub> (gray ribbon) in complex with Ap5A<sup>1</sup> (1AKE).

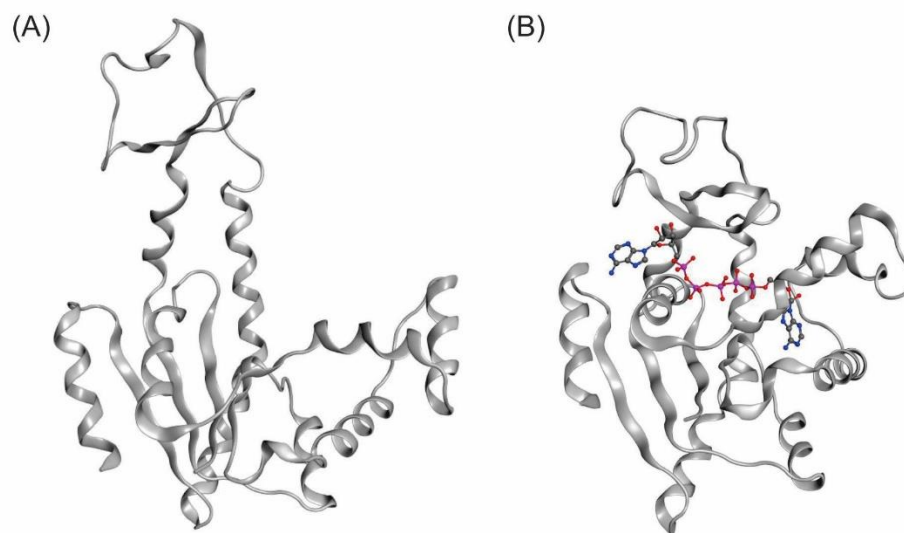

**Figure S3.** Structures of an open and closed NMP kinase. Crystallographic structures of  $AK_{eco}$  are used for illustration of the open and closed states. **(A)** Substrate free and open  $AK_{eco}^3$  (4AKE). **(B)** Ap5A bound and closed  $AK_{eco}^1$  (1AKE).

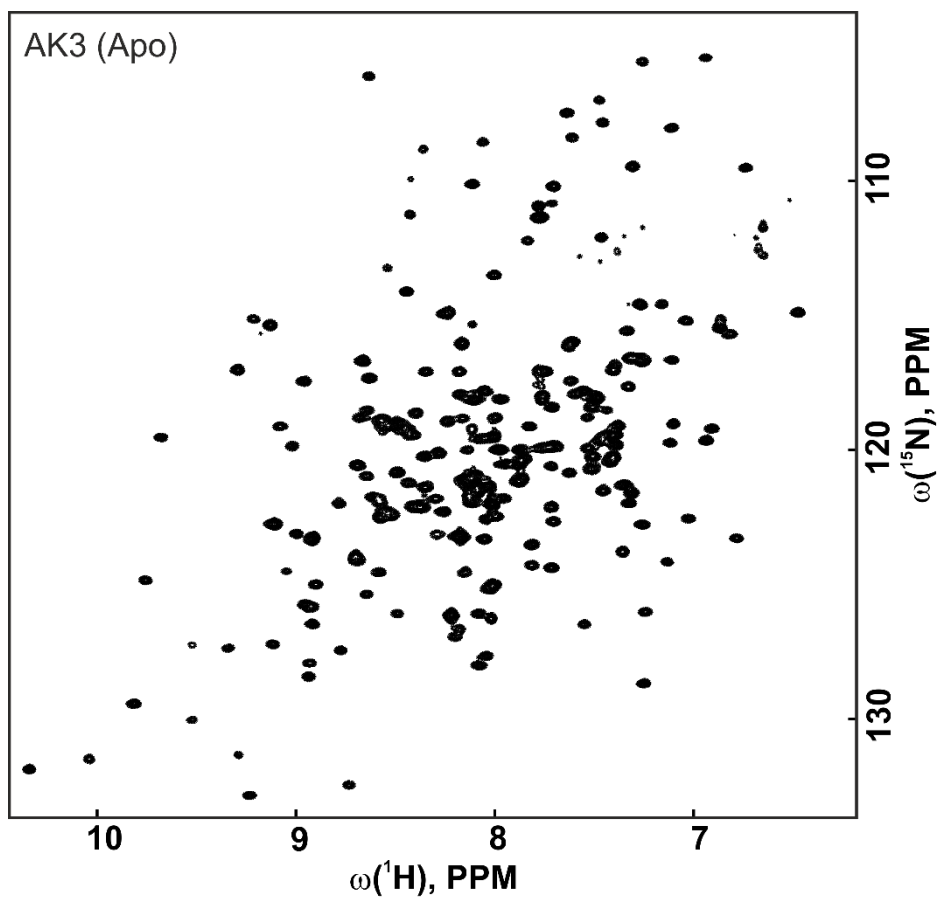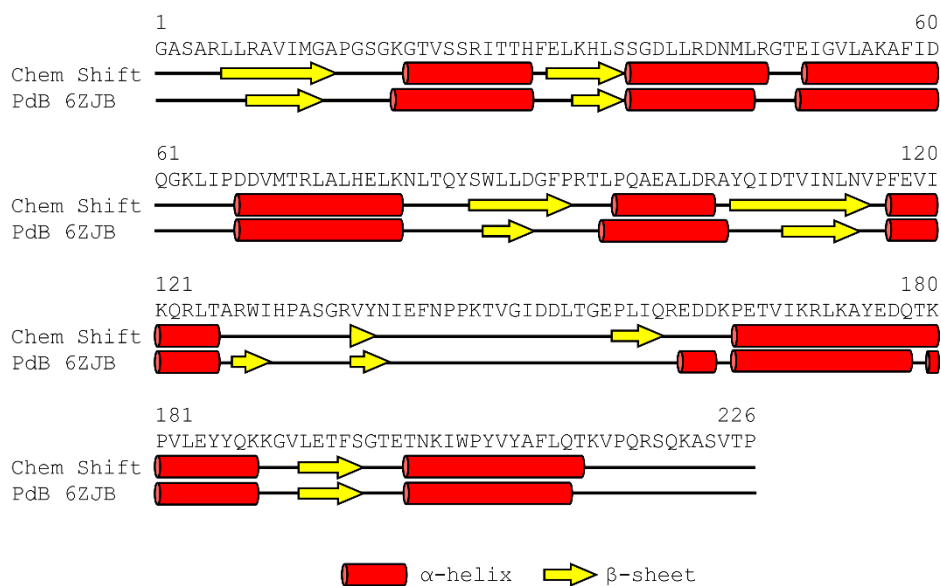

**Figure S4.** Top; Trosy-HSQC spectra of human AK3 (apo form) and bottom; a comparison between predicted secondary structure based on the chemical shifts and the secondary structure of the high resolution AK3-Gp5A X-ray structure (6ZJB.pdb).

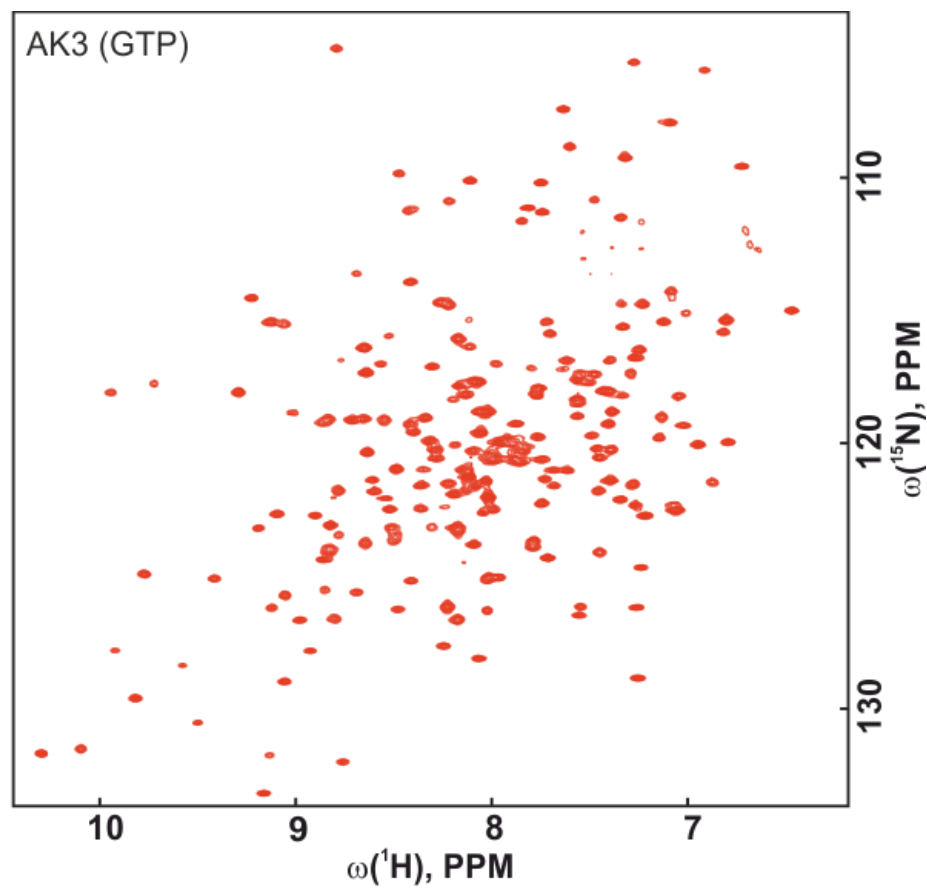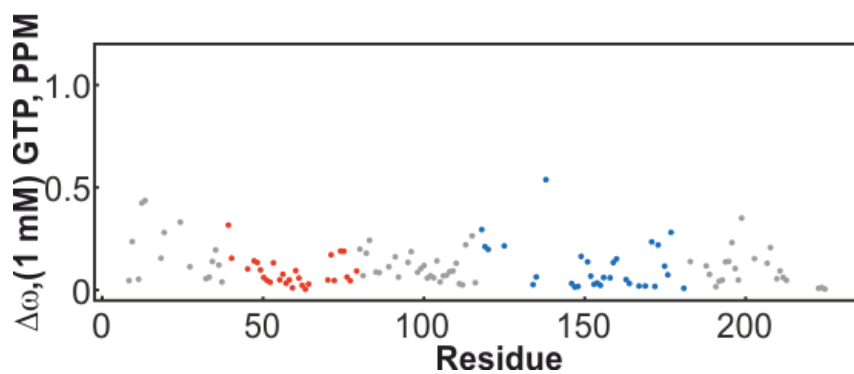

**Figure S5** Top; Trosy-HSQC spectra of human AK3 (GTP saturated, 1mM) and bottom; chemical shift differences ( $|^1\text{H}|+0.2*|^15\text{N}|$ ) between apo AK3 and AK3 saturated with 1 mM GTP. Residues in the GTPlid are colored red and residues in the AMPbd are colored blue.

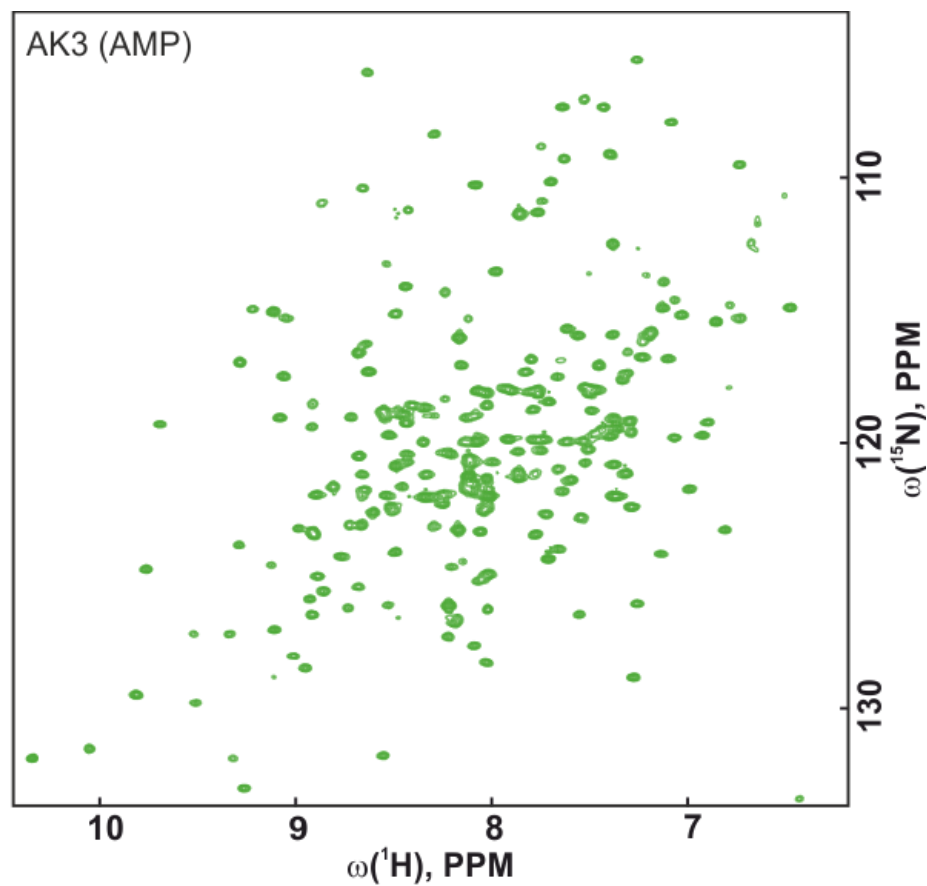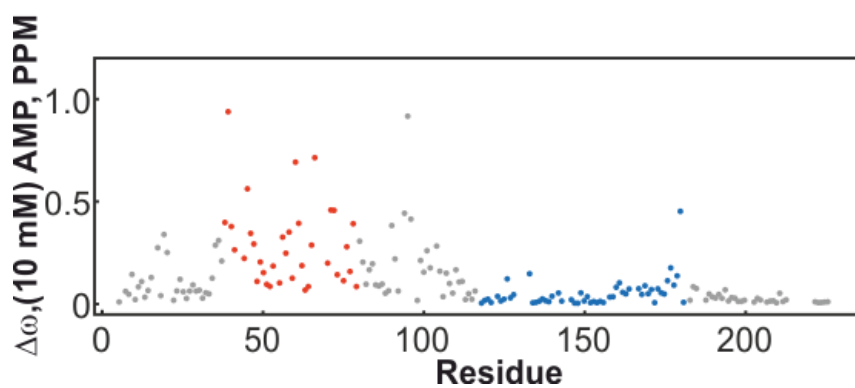

**Figure S6** Top: Trosy-HSQC spectra of human AK3 (AMP saturated, 10 mM) and bottom; chemical shift differences ( $|^1\text{H}|+0.2*|^{15}\text{N}|$ ) between apo AK3 and AK3 saturated with 10 mM AMP. Residues in the GTPlid are colored red and residues in the AMPbd are colored blue.

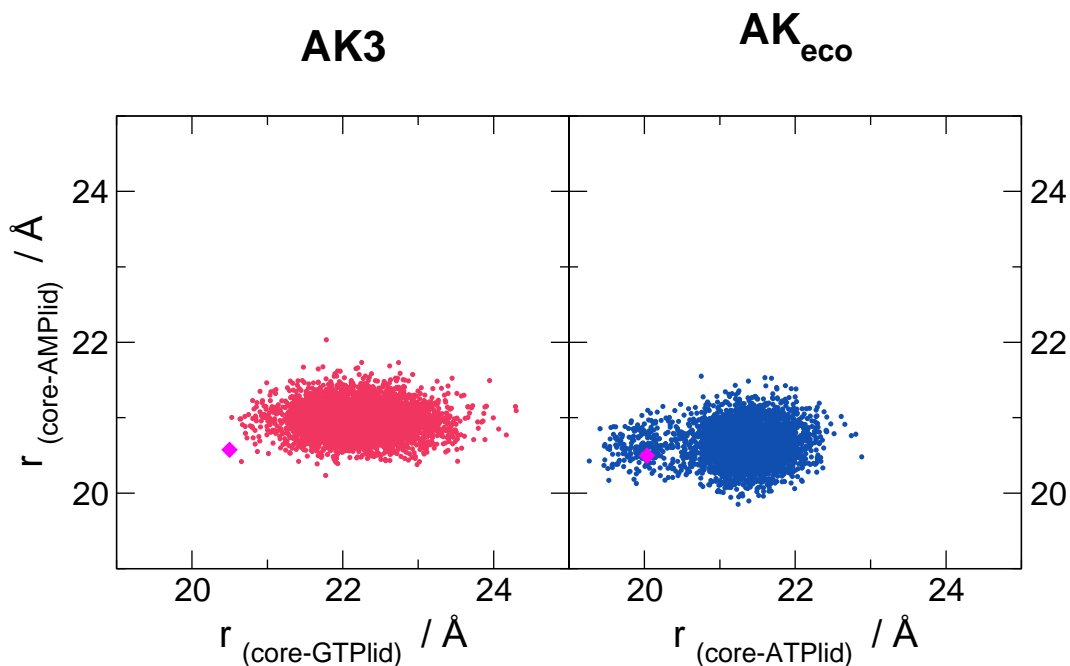

**Figure S7. Displacement of the nucleotide binding domains relative to the protein core in AK3 and AK<sub>eco</sub> during the course of an 500 ns MD simulation.**

The lid-to-core center-of-mass distances were calculated on the atomic coordinates saved every 0.1 ns. The elliptical distribution in AK3 (*left panel*) indicates the shifting of the GTPlid by approximately 3 Å in the direction towards and away from the protein core while the AMPbd displaces only by about 0.5 Å around the 21 Å mark. The distribution pattern for AK<sub>eco</sub> (*right panel*) is more spherical suggesting that both domains exhibit a similar range of motion relative to the core, with the ATPlid domain being at a marginally farther distance from the core. Pink diamonds in both panels mark the values for the respective X-ray structures.

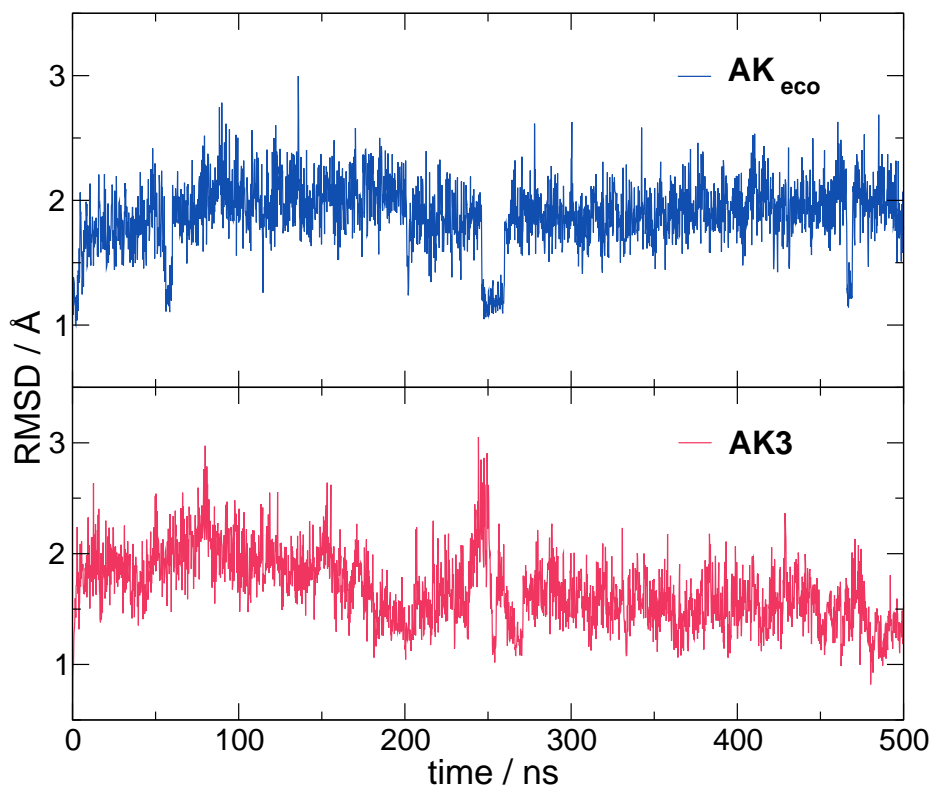

**Figure S8. The root-mean-square deviation (RMSD) of the backbone atomic position during the course of a 500 ns MD simulation.**

The RMSD value quantifies a relative deviation of atomic position per coordinate frame saved every 0.1 ns against the X-ray crystalline reference structure. Both adenylate kinase models demonstrate appropriate structural stability of the equilibrated system with an average displacement of 2 Å (AK<sub>eco</sub>) and 1.5 Å (AK3) from the reference conformation.



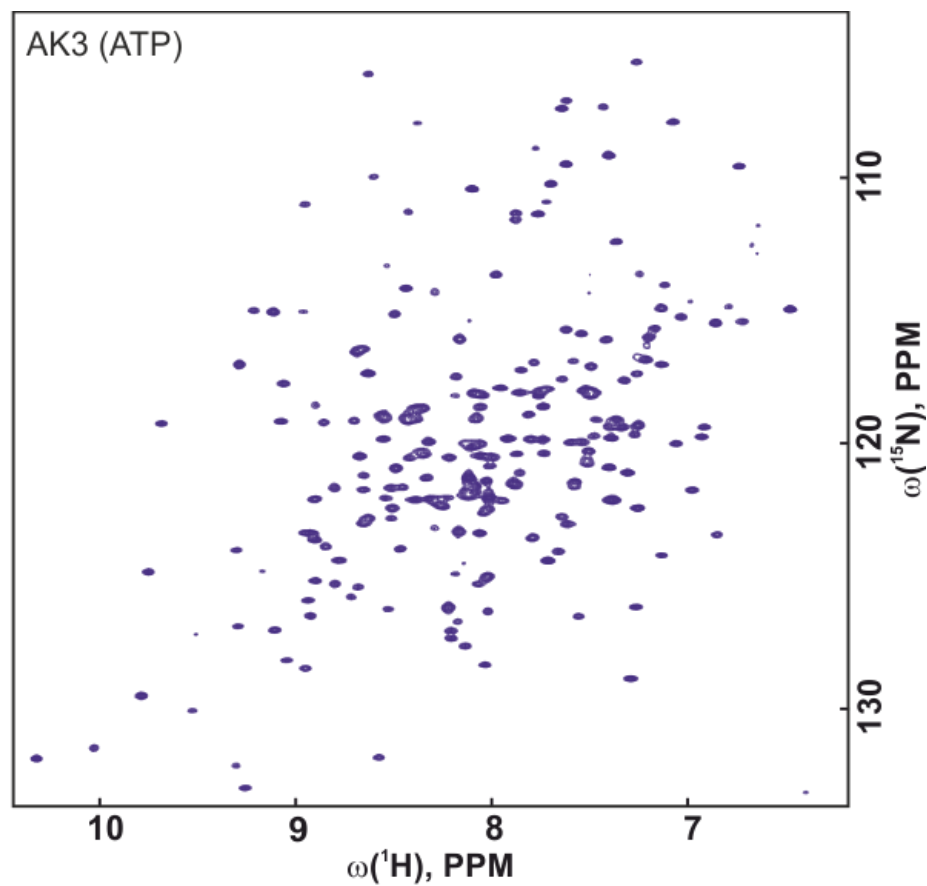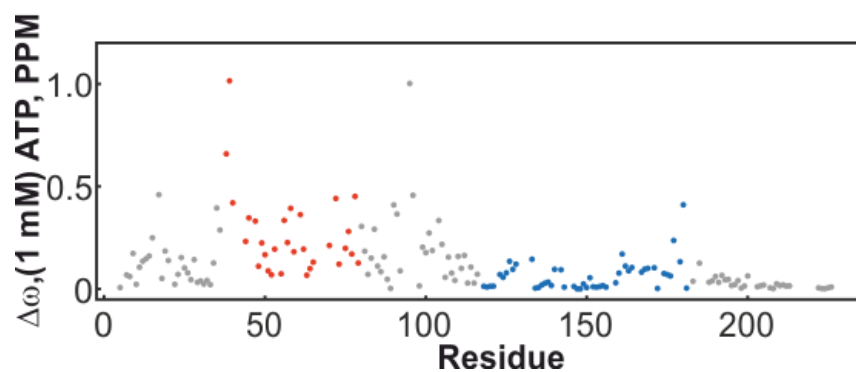

**Figure S9** Top; Trosy-HSQC spectra of human AK3 (ATP saturated, 1mM) and bottom; chemical shift differences ( $|\omega(^1\text{H})+0.2*\omega(^{15}\text{N})|$ ) between apo AK3 and AK3 saturated with 1 mM ATP. Residues in the GTPlid are colored red and residues in the AMPdb are colored blue.

## References

- (1) Müller, C. W.; Schulz, G. E., (1992) Structure of the complex between adenylate kinase from *Escherichia coli* and the inhibitor AP5A refined at 1.9 Å resolution - A model for a catalytic transition-State. *J. Mol. Biol.* 224, 159-177.
- (2) Moon, S.; Kim, J.; Bae, E., (2017) Structural analyses of adenylate kinases from Antarctic and tropical fishes for understanding cold adaptation of enzymes. *Scientific Reports* 7, 12.
- (3) Müller, C. W.; Schlauderer, G. J.; Reinstein, J.; Schulz, G. E., (1996) Adenylate kinase motions during catalysis: An energetic counterweight balancing substrate binding. *Structure* 4, 147-156.
